# Supplementary material for: Mechanisms of copy number variation and hybrid gene formation in the KIR immune gene complex
Source: PubMed Central journal article supplement — Hum Mol Genet. 2009 Dec 3;19(5):737–51. doi: 10.1093/hmg/ddp538 (PMC2816608; doi:10.1093/hmg/ddp538), 2009-12-03

**Supplementary figure 1:** The structure of an Alu element. The breakpoint interval includes a recombination hotspot intrinsic to the Alu element. The length of the Alu sequence is ~282 bp, excluding the 3' poly(A) tail. The element consists of left (diagonal shaded) and right (diamond shaded) monomers. The left monomer contains an RNA polymerase III promoter (a and b). The Alu recombination hotspot is demarcated by a red box. The KIR2DL3/2DP1 break interval incorporated within the Alu element is represented by a blue line.

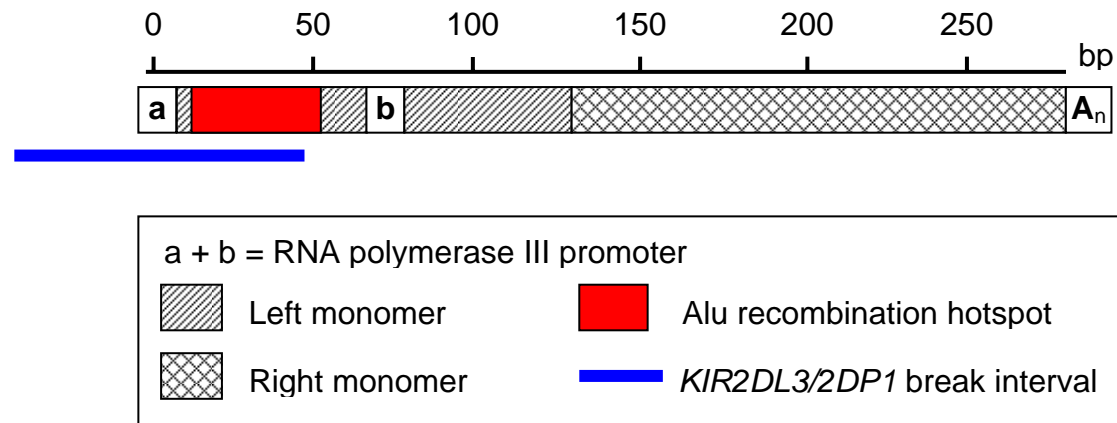









AluYb8 TTGCGCCACTGCAGTCCGCTGGGGCACA-GAGCGAGACTCCGTCTCA---- 289  
AluYb9 TTGCGCCACTGCAGTCCGCTGGGGCACA-GAGCGAGACTCCGTCTCA---- 289  
AluYb3a2 TAGCGCCACTGCAGTCCG-----GCCTGGGGCAAA-GAGCGAGACTCCGTCTCA---- 282  
AluYb3a1 TTGCGCCACTGCAGTCCA-----GCCTGGGGCACA-GAGCGAGACTCCGTCTCA---- 282  
AluYbc3a TAGCGCCACTGCAGTCCA-----GCCTGGGGCAAA-GAGCGAGACTCCGTCTCA---- 283  
AluYk12 TAGCGCCACTGCAGTCCA-----GCTTGGGGCAAA-GAGTGAGACTCCGTCTCA----- 286  
AluYi6 TTGCGCCACTGCAGTCCC-----GCCTGGGGCACA-GAGCGAGACTCCGTCTCA---- 283  
AluYc1 TCGCGCCACTGCAGTCCA-----GCCTGGGGCACA-GAGCGAGACTCCGTCTCA---- 282  
AluYc2 TCGCGCCACTGCAGTCCA-----GCCTGGGGCACA-GAGCGAGACTCCGTCTCA---- 282  
AluYa5 TCCCGCCACTGCAGTCCA-----GCCTGGGGCACA-GAGCGAGACTCCGTCTCA---- 282  
AluYa8 TCCCGCCACTGCAGTCCA-----GCCTGGGGCACA-GAGCGAGACTCCGTCTCA---- 281  
AluYa4 TCGCGCCACTGCAGTCCA-----GCCTGGGGCACA-GAGCGAGACTCCGTCTCA---- 282  
AluYc5 TCGCGCCACAGCACTCCC-----GCCTGGGGCACA-GAGCGAGACTCCGTCTCA----- 274  
AluYd8 TCGCGCCACAGCACTCCC-----GCCTGGGGCACA-GAACGAGACTCCGTCTCA---- 270  
AluYk11 TTGCGCCACTGCAGTCCG-----GCCTGGGGTAAA-GAGCGGACTCCGTCTCA----- 286  
AluYd2 TCGCGCCACTGCAGTCCA-----GCCTGGGGCACA-GAGCGAGACTCCGTCTCA---- 270  
AluYd3 TCGCGCCACTGCAGTCCA-----GCCTGGGGCACA-GAGCGAGACTCCGTCTCA---- 270  
AluYd3a1 TCGCGCCACTGCAGTCCA-----GCCTGGGGCACA-GAGCGAGACTCCGTCTCA---- 271  
AluYh9 TCGCGCCACTGCAGTCCA-----GCCTGGGGCACA-GAGCGAGACTCCGTCTCA---- 282  
AluYk13 TCGCGCCACTGCAGTCCA-----GCCTGGGGCACA-GAGCCAGACTCCGTCTCA----- 286  
AluYa1 TCCCGCCACTGCAGTCCA-----GCCTGGGGCACA-GAGCGAGACTCCGTCTCA---- 282  
AluY TCGCGCCACTGCAGTCCA-----GCCTGGGGCACA-GAGCGAGACTCCGTCTCA---- 282  
AluYe5 TCGCGCCACTGCAGTCCA-----GCCTGGGGCACA-G--CGAGACTCCGTCTCA---- 281  
AluYf5 TCGCGCCACTGCAGTCCA-----GCCTGGGGCACA-G--CGAGACTCCGTCTCA----- 285  
AluYe2 TCGCGCCACTGCAGTCCA-----GCCTGGGGCACA-G--CGAGACTCCGTCTCA---- 280  
AluYf1 TCGCGCCACTGCAGTCCA-----GCCTGGGGCACA-GAGCGAGACTCCGTCTCA---- 282  
AluYf2 TCGCGCCACTGCAGTCCA-----GCCTGGGGCACA-GAGCGAGACTCCGTCTCA---- 284  
AluYg6 TCGCGCCACTGCAGTCCA-----GCCTGGGGCACA-GAGCGAACTCCGTCTCA---- 282  
AluSc8 TCGCGCCACTGCAGTCCA-----GCCTGGGGCACA-GAGCGAGACTCCGTCTCA----- 286  
AluSc TCGCGCCACTGCAGTCCA-----GCCTGG--CGACA-GAGCGAGACTCCGTCTCA---- 280  
AluSc5 TCGCGCCACTGCAGTCCA-----GCCTGG--CGACA-GAGCGAGACTCCGTCTCA----- 284  
AluSx3 TCGCGCCACTGCAGTCCA-----GCCTGGGGCACA-GAGCGAGACTCCGTCTCA----- 286  
AluSg4 TCGCGCCACTGCAGTCCA-----GCCTGGGGCACA-GAGCGAGACTCCGTCTCA----- 285  
AluSg7 TCGCGCCACTGCAGTCCA-----GCCTGGGGCACA-GAGCGAGACTCCGTCTCA----- 284  
AluSp TCGCGCCACTGCAGTCCA-----GCCTGGGCAACAAGAGCGAACTCCGTCTCA---- 284  
AluSq TCGCGCCACTGCAGTCCA-----GCCTGGGGCACAAGAGCGAACTCCGTCTCA---- 284  
AluSq2 TCGCGCCACTGCAGTCCA-----GCCTGGGGCACAAGAGCGAACTCCGTCTCA----- 288  
AluSq10 TCGCGCCACTGCAGTCCA-----GCCTGGGGGACAAGAGCGAGACTTCGTCTCA----- 288  
AluSq4 TCGCGCCACTGCAGTCCA-----GCCTGGGCAACAAGAGCGAACTCCGTCTCA----- 287  
AluSx1 TCGCGCCACTGCAGTCCA-----GCCTGGGGCACA-GAGCGAGACTCCGTCTCA----- 287  
AluSx4 TCGCGCCACTGCAGTCCA-----GCCTGGGGCACA-GAGCGAGACTCCGTCTCA----- 286  
AluSg TCGCGCCACTGCAGTCCA-----GCCTGGGGCACA-GAGCGAGACTCCGTCTCA---- 281  
AluSz TCGCGCCACTGCAGTCCA-----GCCTGGGGCACA-GAGCGAGACTCCGTCTCA---- 283  
AluSx TCGCGCCACTGCAGTCCA-----GCCTGGGGCACA-GAGCGAGACTCCGTCTCA----- 283  
AluSg1 TCGCGCCACTGCAGTCCA-----GCCTGGGGCACA-GAGCGAGACTCCGTCTCA---- 280  
AluSz6 TCGCGCCACTGCAGTCCA-----GCCTGGGGCACA-GAGCGAGACTTCGTCTCA----- 287  
ALU TCGCGCCACTGCAGTCCA-----GCCTGGGGCACA-GAGCGAGACTTCGTCTCA----- 287  
AluJo TCGCGCCACTGCAGTCCA-----GCCTGGGGCACA-GAGCGAGACTTCGTCTCA---- 283  
AluJr TCGCGCCACTGCAGTCCA-----GCCTGGGGCACA-GAGCGAGACTTCGTCTCA----- 287  
AluJr4 TCGCGCCACTGCAGTCCA-----GCCTGGGGCACA-GAGCGAGACTTCGTCTCA----- 287  
AluJb TCGCGCCACTGCAGTCCA-----GCCTGGGGCACA-GAGCGAGACTTCGTCTCA---- 283  
\* \*\*\*\*\* \*\* \*\* \*\* \*\* \*\* \*\* \*\* \*\* \* \* \* \* \* \*\* \*\*\*\*\*

|          |                                 |     |
|----------|---------------------------------|-----|
| AluYb8   | -----                           |     |
| AluYb9   | -----                           |     |
| AluYb3a2 | -----                           |     |
| AluYb3a1 | -----                           |     |
| AluYbc3a | -----                           |     |
| AluYk12  | AAAAAAAAAAAAAAAAAAAAAAAAAAAA--  | 312 |
| AluYi6   | -----                           |     |
| AluYc1   | -----                           |     |
| AluYc2   | -----                           |     |
| AluYa5   | -----                           |     |
| AluYa8   | -----                           |     |
| AluYa4   | -----                           |     |
| AluYc5   | AAAAAAAAAAAAAAAAAAAAAAAAAAAA--- | 299 |
| AluYd8   | -----                           |     |
| AluYk11  | AAAAAAAAAAAAAAAAAAAAAAAAAAAA--  | 312 |
| AluYd2   | -----                           |     |
| AluYd3   | -----                           |     |
| AluYd3a1 | -----                           |     |
| AluYh9   | -----                           |     |
| AluYk13  | AAAAAA-----                     | 292 |
| AluYa1   | -----                           |     |
| AluY     | -----                           |     |
| AluYe5   | -----                           |     |
| AluYf5   | AAAAAAAAAAAAAAAAAAAAAAAAAAAA-   | 312 |
| AluYe2   | -----                           |     |
| AluYf1   | -----                           |     |
| AluYf2   | -----                           |     |
| AluYg6   | -----                           |     |
| AluSc8   | AAAAAAAAAAAAAAAAAAAAAAAAAAAA--  | 312 |
| AluSc    | -----                           |     |
| AluSc5   | AAAAAAAAAAAAAAAAAAAAAAAAAAAA    | 312 |
| AluSx3   | AAAAAAAAAAAAAAAAAAAAAAAAAAAA--  | 312 |
| AluSg4   | AAAAAAAAAAAAAAAAAAAAAAAAAAAA-   | 312 |
| AluSg7   | AAAAAAAAAAAAAAAAAAAAAAAAAAAA    | 312 |
| AluSp    | -----                           |     |
| AluSq    | -----                           |     |
| AluSq2   | AAAAAAAAAAAAAAAAAAAAAAAAAAAA--- | 312 |
| AluSq10  | AAAAAAAAAAAAAAAAAAAAAAAAAAAA--- | 312 |
| AluSq4   | AAAAAAAAAAAAAAAAAAAAAAAAAAAA--- | 312 |
| AluSx1   | AAAAAAAAAAAAAAAAAAAAAAAAAAAA--- | 312 |
| AluSx4   | AAAAAAAAAAAAAAAAAAAAAAAAAAAA--  | 312 |
| AluSg    | -----                           |     |
| AluSz    | -----                           |     |
| AluSx    | -----                           |     |
| AluSg1   | -----                           |     |
| AluSz6   | AAAAAAAAAAAAAAAAAAAAAAAAAAAA--- | 312 |
| ALU      | AAAAAAAAAAAAAAAAAAAAAAAAAAAA--- | 312 |
| AluJo    | -----                           |     |
| AluJr    | AAAAAAAAAAAAAAAAAAAAAAAAAAAA--- | 312 |
| AluJr4   | AAAAAAAAAAAAAAAAAAAAAAAAAAAA--- | 312 |
| AluJb    | -----                           |     |

**Supplementary figure 3:** Potential ssDNA secondary structures formed in an Alu sequence. The Alu recombination hotspot is boxed(23). The bold black line depicts a degenerate 13-mer motif that is associated with recombination hot spots and genome instability in humans(28).

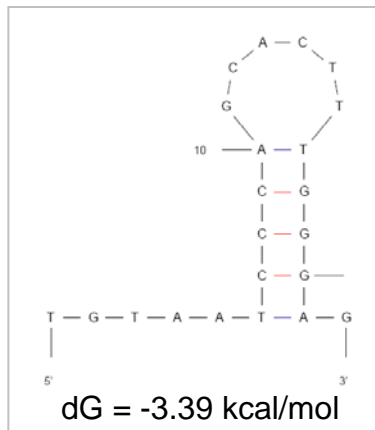

Alu recombination hotspot

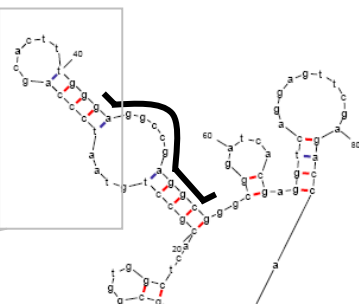

Alu element

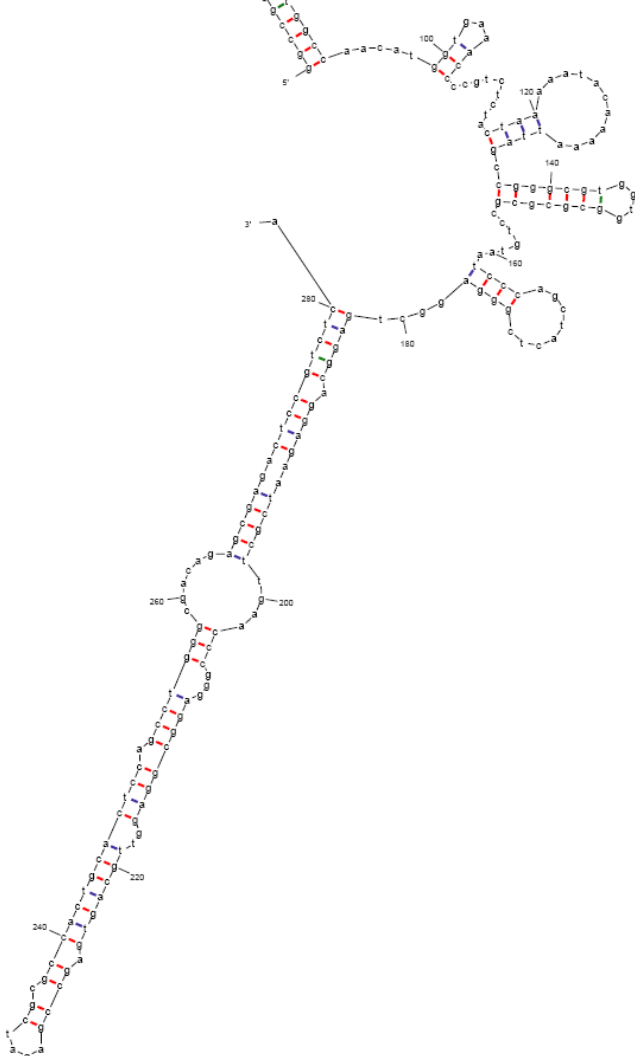



**Supplementary figure 4:** The KIR2DP1 single ITIM. Sequence alignment of exons 6 - 9 (encoding stem, transmembrane and cytoplasmic domains) of KIR2DL3/2DP1, KIR2DL4, KIR3DL3 and all known alleles of KIR2DL3 is shown. KIR3DL3 also possesses a single ITIM (V/I/L/SxYxxL/V/I/S), whereas KIR2DL4 possesses a single ITIM and carries a charged residue in the transmembrane region.

|          |           | 210        | 220        | 230        | 240        | 250        | 260        | 270        |
|----------|-----------|------------|------------|------------|------------|------------|------------|------------|
| 2DP1*002 | 2DL3/2DP1 | GNPSNSWPSP | TEPSSKTGNP | RHLHVLIGTS | VVIILFILLL | FFLLHRWCNS | KKNAAVMDQE | PAGNRTANSE |
| 2DL3*001 |           | -----P--   | -----E---- |            |            | -----C-    | ----V----- | -----V-R-  |
| 2DL3*002 |           | -----L--   | -----E---- |            |            | -----C-    | ----V----- | -----V-R-  |
| 2DL3*003 |           |            | -----E---- |            |            | -----C-    | ----V----- | -----V-R-  |
| 2DL3*004 |           |            | -----E---- | I-----     |            | -----C-    | ----V----- | -----V-R-  |
| 2DL3*005 |           |            | -----E---- |            |            | -----C-    | ----V----- | -----V-R-  |
| 2DL3*006 |           |            | -----E---- |            |            | -----C-    | ----V----- | -----V-R-  |
| 2DL3*007 |           | -----L--   | -----E---- |            |            | -----C-    |            | S-----     |
| 2DL4     |           | ---S-----  | ---F---IA  | ---AV-RY-  | -A---TI-P  | -----K     | -----N--   | ---H--V-R- |
| 3DL3     |           | ---*****   | ---*****   |            | ---P-AI--  | -----A-    | ----V----- | -----V-R-  |

**Exon 6: Stem**

**Exon 7: Transmembrane**

**Exon 8: Cytoplasmic**

|          |           | ITIM 1 site   |            |            | ITIM 2 site |            |               |
|----------|-----------|---------------|------------|------------|-------------|------------|---------------|
|          |           | 280           | 290        | 300        | 310         | 320        | 330           |
| 2DP1*002 | 2DL3/2DP1 | DSDEQDPQEV    | TYVQLDHCVF | TQRKITRPSQ | RPKTPPTDTR  | VYTELPNAES | RSKVVSCP      |
| 2DL3*001 |           | -----A--N---- |            | -----R---  | -----II     | -----P     |               |
| 2DL3*002 |           | -----A--N---- |            | -----H---  | -----II     | -----P     |               |
| 2DL3*003 |           | -----T--N---- |            |            | -----II     | -----P     |               |
| 2DL3*004 |           | -----A--N---- |            | -----H---  | -----II     | -----P     |               |
| 2DL3*005 |           | -----A--N---- |            | -----H---  | -----II     | -----P     |               |
| 2DL3*006 |           | -----A--N---- |            | -----H---  | -----II     | -----P     |               |
| 2DL3*007 |           | -----A--N---- |            | -----H---  | -----II     | -----P     |               |
| 2DL4     |           | -----A--I-    |            | -----G---  | -S-R-S---   | S-CI-----P | RALSPAHEHH... |
| 3DL3     |           | -----A--N---- |            |            | -----S V    |            |               |

**Exon 9: Cytoplasmic**

**Supplementary figure 5:** Phylogenetic relationship of KIR2DP1 with other human KIR groups. Tree distances are shown after each node.

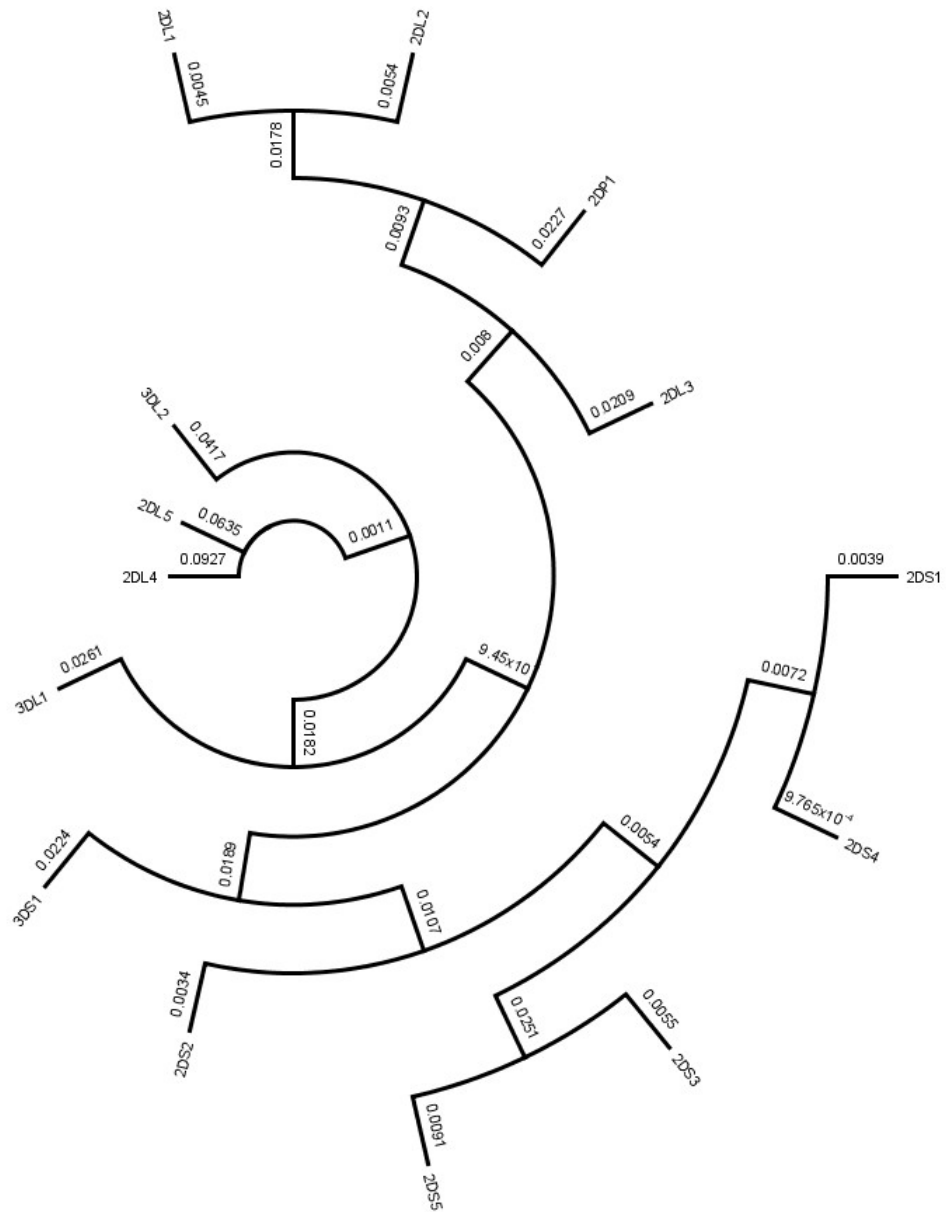

**Supplementary figure 6:** Transcription of the KIR2DL1/2DS1 hybrid. Using specific primers for RT-PCR, KIR2DL1/S1 transcript could be amplified from NK cDNA.

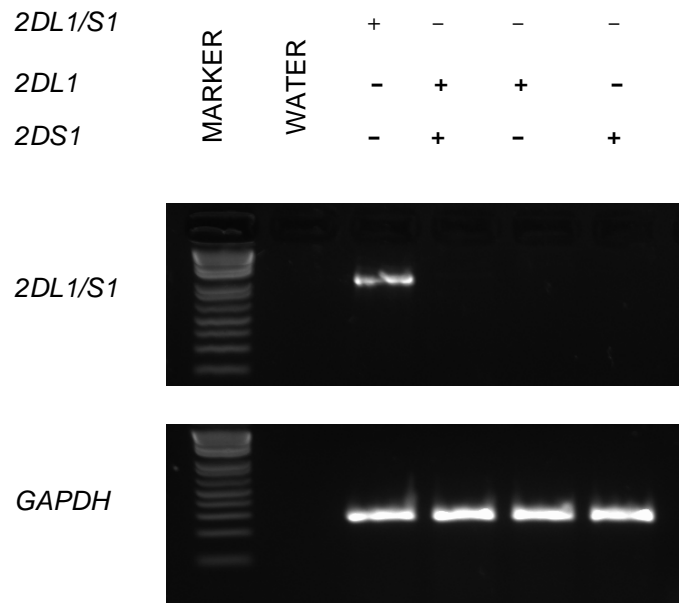

**Supplementary figure 7:** KIR2DL1/2DS1 Sp1 and YY1 transcription factor binding sites. Sequence alignments of the region corresponding to the YY1 and SP1-binding sites of the indicated KIR genes, against the consensus binding motifs of the respective transcription factor. Nucleotide numbering corresponds to position relative to the translation initiation codon of the KIR2DL1/S1 gene, where the base A of the ATG codon is denoted nucleotide +1. The Sp1 site spans nucleotides -24 to -33 relative to the translation start site of the KIR transcript. The YY1 binding site is located at nucleotides -172 to -178, downstream of the region where antisense transcription is initiated.

|               |    |                  |    |
|---------------|----|------------------|----|
|               |    | -172             |    |
|               |    |                  |    |
| YY1 consensus |    | CCATNTT          |    |
| 2DS1*002      | AG | CC <b>G</b> TGTT | CC |
| 2DL1/S1       | AG | CC <b>G</b> TGTT | CC |
| 2DL1          | AG | CC <b>G</b> TGTT | CC |

|               |    |                              |           |
|---------------|----|------------------------------|-----------|
|               |    | -24                          |           |
|               |    |                              |           |
| Sp1 consensus |    | GRGGCRGGGW                   |           |
| 2DL1/2DS1     | CT | CGG <b>T</b> CG <b>C</b> GGC | <b>TG</b> |
| 2DL1          | CT | CGG <b>T</b> CG <b>C</b> GGC | <b>TG</b> |
| 2DS1*002      | CT | GGGGCG <b>C</b> GGC          | CG        |
| 3DL1*002      | CT | GGGGCG <b>C</b> GGC          | CG        |

Apart from a non-synonymous nucleotide substitution (amino acid change: Leu/Thr) at position +10 of the leader peptide sequence (Figure 11), *KIR2DS1* and *KIR2DL1* are identical across exons 1-3, upstream of the intron 3 *KIR2DL1/2DS1* break site. The biological consequence of the leader peptide amino acid substitution is not known, however other genomic differences in *KIR* proximal promoter sequences are known to regulate functional activity of the bidirectional *KIR* promoters and are primary determinants of receptor expression (PMID: 19008943).

Apart from the non-transcribed *KIR2DL5\*002* allele that has a disrupted AML-binding site, the transcription factor binding sites (TFBS) within the core promoter region of *KIR* genes and alleles are conserved. Modulation of *KIR* promoter activity is achieved through polymorphisms in TFBS that flank the core promoter region (outer-core region). To investigate the genetic differences in the regulatory regions of *KIR2DL1/2DS1* hybrid (possessing proximal promoter sequence of *KIR2DL1*) compared to *KIR2DS1*, DNA sequences containing the previously identified bidirectional promoter region

(the 300 bp of upstream sequence from the initiation codon) were examined for sequence variation (Figure 14). A total of ten SNPs and a single 1 bp deletion were identified. None of the sequence variation located to the central area, leaving the core promoter region untouched. All sequence variation was situated in the outer-core regions associated with control of bi-directional promoter activity.

Single nucleotide differences in the Sp1 and YY1 TFBSs in the outer-core promoter region have been shown previously to have a significant effect on *KIR* transcriptional activity (PMID: 19008943). Both the *KIR2DL1/2DS1* hybrid gene (*KIR2DL1\*001* promoter) and *KIR2DS1\*002* share an identical sequence over the YY1 site and have an A to G nucleotide substitution at the same position with respect to the TFBS consensus sequence (Figure S7). This substitution has previously been shown to abrogate YY1 binding (PMID: 15940669) and is associated with strong antisense promoter activity (PMID: 19008943). However, *KIR2DL1/S1* (*KIR2DL1\*001* promoter) and *KIR2DS1\*002* differ at the Sp1 site, predicting functional differences in forward promoter activity of the genes. The *KIR2DL1/S1* promoter has three SNPs relative to the canonical Sp1 site (Figure S7). In electrophoretic mobility shift assay (EMSA) analysis, the G to T substitution seen in *KIR2DL1/2DS1* has been shown to reduce Sp1 binding to undetectable levels and is associated with increased forward promoter activity (PMID: 19008943). In contrast, *KIR2DS1\*001* has only one nucleotide discrepancy at the Sp1 site with respect to the TFBS consensus sequence. EMSA analysis has shown that the *KIR2DS1* Sp1 site (which is shared by *KIR3DL1\*002*) maintains binding capacity to Sp1 (PMID: 19008943). In the probabilistic model of the bidirectional *KIR* promoter, these sequence differences predict a higher frequency expression of the putatively activating *KIR2DL1/2DS1* relative to the wild type *KIR2DS1\*002* gene, which is predicted to have strongly dominant reverse promoter activity and accordingly low gene expression (PMID: 17315044).

The nine additional nucleotide polymorphisms identified in the bidirectional promoter region outside Sp1 and YY1 sites have the potential to differentiate further the expression of the *KIR2DL1/S1* hybrid gene relative to *KIR2DS1* by altering the affinity or specificity of transcription factor binding or by changing the kinetics of transcription (Figure 14). Indeed, seven of the nine polymorphisms disrupted putative TFBS predicted by the MatInspector program. A potential heat-shock transcription factor-binding site, HSF-1, was identified in the *KIR2DS1* promoter, suggesting up-regulation by cellular stress.

**Supplementary figure 8:** Allele frequencies of KIR3DL2\*007 and KIR3DL3\*00602 in worldwide populations. Data from [www.allelefreqencies.net](http://www.allelefreqencies.net) by kind permission. New Allele Frequency Database: <http://www.allelefreqencies.net>. Middleton D, Menchaca L, Rood H, Komerofsky R. Tissue Antigens 2003, 61, 403-407. KIR3DL3\*00602 is relatively rare in Caucasians suggesting that the ancestral precursor of the *j* and/or *t* haplotypes may originate from a different ethnic population.

| Allele     | Population            | Phenotype Frequency (%) | Allele Frequency | Sample Size |
|------------|-----------------------|-------------------------|------------------|-------------|
| 3DL2*007   | Brazil Belo Horizonte | 21.1                    |                  | 90          |
| 3DL2*007   | China Zhejiang Han    |                         | 0.130            | 104         |
| 3DL2*007   | Cuban White           | 30.0                    |                  | 70          |
| 3DL2*007   | England KIR           | 33.1                    |                  | 334         |
| 3DL2*007   | Finland Helsinki      | 46.2                    |                  | 101         |
| 3DL2*007   | Hong Kong Chinese     | 33.0                    |                  | 100         |
| 3DL2*007   | India North Hindus    | 57.1                    |                  | 72          |
| 3DL2*007   | Ireland Northern      | 32.0                    | 0.180            | 200         |
| 3DL2*007   | Ireland Northern      | 38.3                    |                  | 154         |
| 3DL2*007   | Japan                 |                         | 0.116            | 132         |
| 3DL2*007   | Oman                  | 17.6                    |                  | 99          |
| 3DL2*007   | South Africa San      | 5.0                     |                  | 91          |
| 3DL2*007   | South Africa Xhosa    | 4.0                     |                  | 50          |
| 3DL2*007   | South Korea           | 17.2                    |                  | 154         |
| 3DL2*007   | USA Caucasian         |                         | 0.188            | 75          |
| 3DL3*00602 | USA Caucasian         |                         | 0.007            | 75          |

**Supplementary figure 9:** Ethno-geographic distribution of the KIR hybrid genes. Populations, samples sizes and carrier frequencies of recombinant genes. We tested 1,214 unrelated individuals from 52 ethnographically distinct populations.

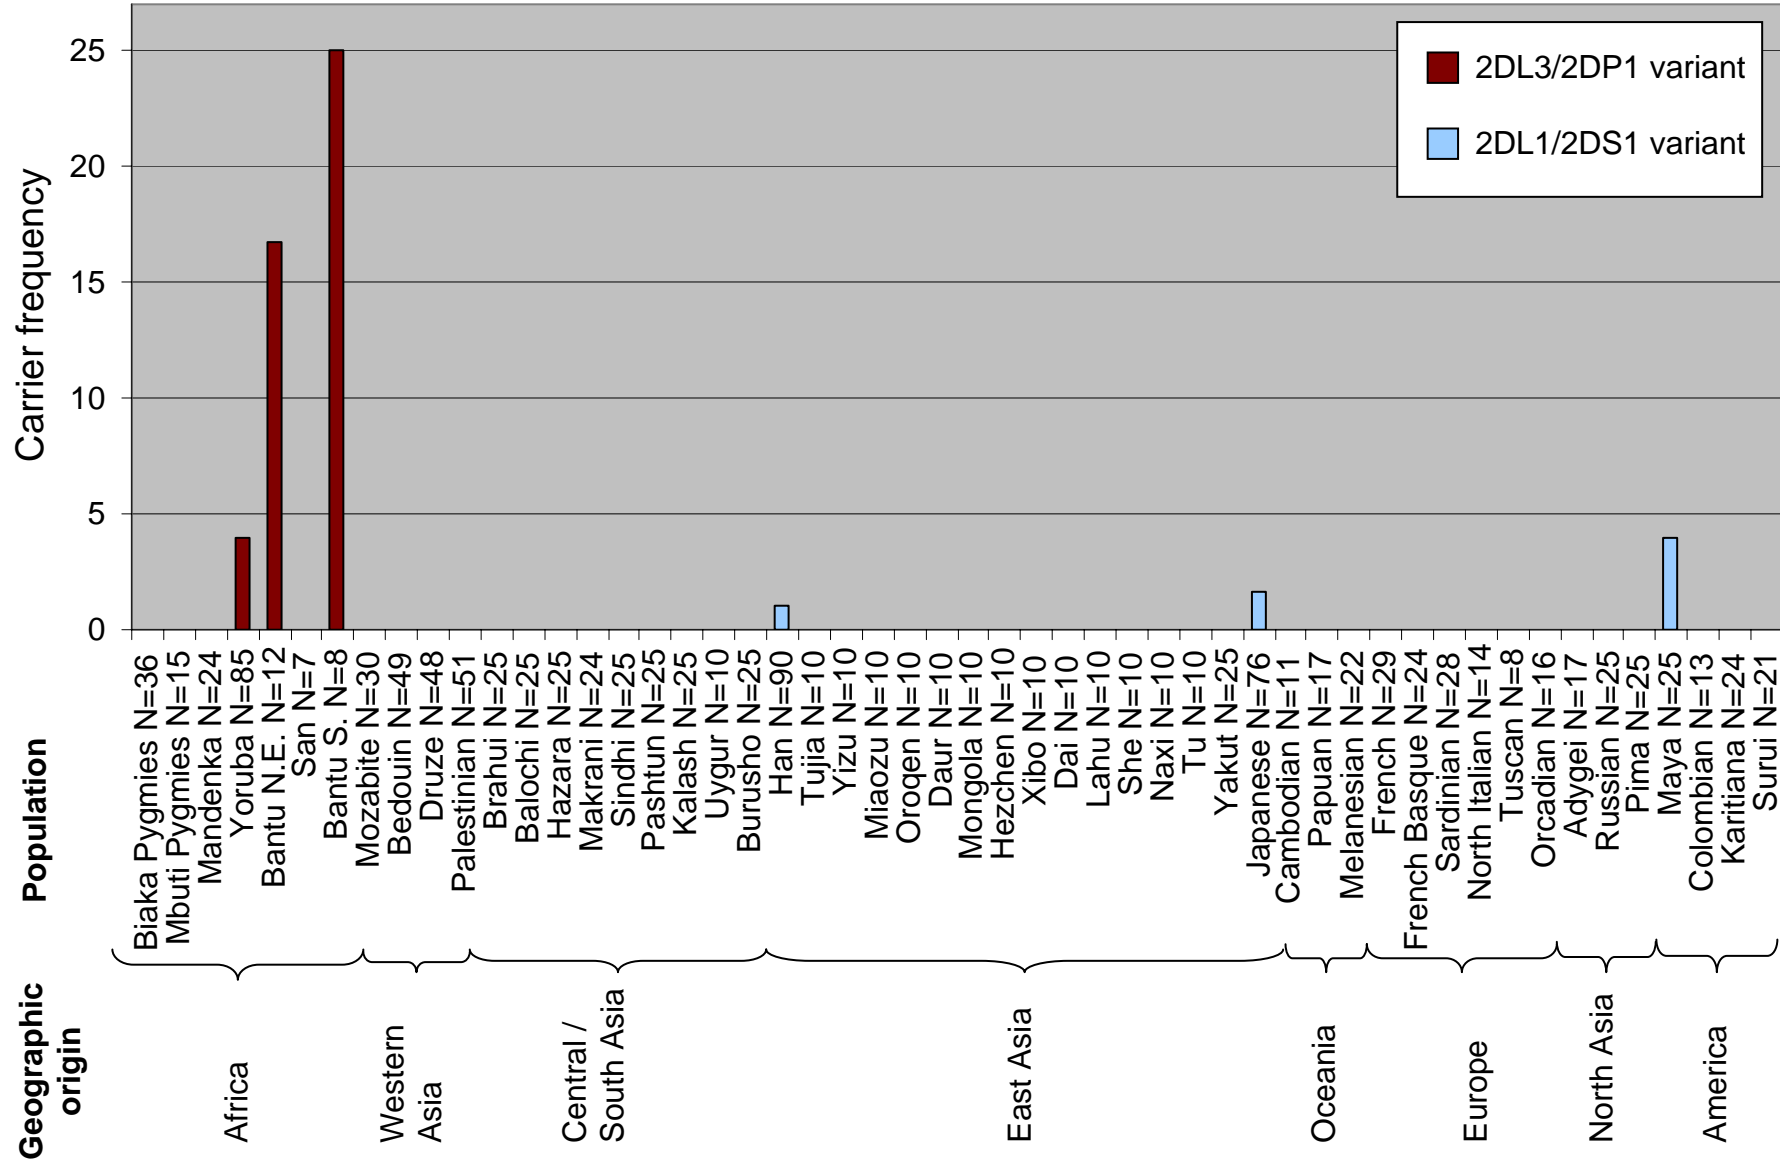

Supplement: ddp538_1.pdf [file ddp538_1.pdf]
